# Supplementary material
Source: Springer Nature journal article supplement (https://www.springermedizin.de/resource/supplementary/12877_2014_1048_MOESM2_ESM.pdf/9440702)
Supplement: MOESM2 [file 9440702]

[Additional file 2] The number of distribution age 95 to 105 for selected countries in 2010

| Age    | Japan | Sweden | Canada | U.S.A | Spain | Italy | U.K.  | Russia | Bulgaria | Norway | Ukraine |
|--------|-------|--------|--------|-------|-------|-------|-------|--------|----------|--------|---------|
| Female |       |        |        |       |       |       |       |        |          |        |         |
| 95     | 79516 | 4118   | 11796  | 96951 | 17048 | 31704 | 25222 | 18755  | 987      | 1790   | 6536    |
| 96     | 60592 | 3051   | 8520   | 71765 | 12493 | 23775 | 18704 | 12589  | 355      | 1292   | 4212    |
| 97     | 44420 | 2166   | 6116   | 52018 | 9225  | 17113 | 13159 | 8602   | 472      | 932    | 3047    |
| 98     | 31986 | 1399   | 4051   | 36143 | 6025  | 11104 | 8980  | 5184   | 308      | 614    | 1706    |
| 99     | 22008 | 873    | 2836   | 25000 | 3998  | 7639  | 6053  | 3365   | 239      | 381    | 1174    |
| 100    | 14631 | 582    | 1805   | 16403 | 2474  | 4661  | 3949  | 1975   | 117      | 213    | 641     |
| 101    | 9398  | 380    | 1148   | 10553 | 1525  | 2858  | 2519  | 1166   | 75       | 146    | 373     |
| 102    | 5717  | 197    | 701    | 6581  | 928   | 1578  | 1482  | 718    | 57       | 78     | 228     |
| 103    | 2904  | 102    | 419    | 3902  | 526   | 885   | 843   | 423    | 35       | 40     | 127     |
| 104    | 1791  | 55     | 235    | 2272  | 266   | 478   | 432   | 243    | 21       | 29     | 71      |
| 105    | 996   | 29     | 136    | 1295  | 132   | 252   | 219   | 143    | 11       | 14     | 38      |
| Male   |       |        |        |       |       |       |       |        |          |        |         |
| 95     | 20473 | 1292   | 3623   | 30121 | 5235  | 9593  | 7139  | 3012   | 491      | 524    | 1217    |
| 96     | 14305 | 877    | 2454   | 20321 | 3691  | 6770  | 4758  | 2069   | 172      | 317    | 809     |
| 97     | 9588  | 551    | 1639   | 13403 | 2546  | 4478  | 3104  | 1293   | 214      | 235    | 525     |
| 98     | 6321  | 327    | 988    | 8475  | 1634  | 2649  | 1935  | 773    | 150      | 130    | 309     |
| 99     | 4078  | 213    | 655    | 5338  | 1033  | 1720  | 1163  | 504    | 120      | 86     | 201     |
| 100    | 2473  | 118    | 372    | 3290  | 614   | 968   | 691   | 291    | 54       | 43     | 109     |
| 101    | 1469  | 68     | 213    | 1882  | 332   | 528   | 374   | 172    | 40       | 29     | 67      |
| 102    | 819   | 36     | 125    | 1133  | 204   | 260   | 190   | 110    | 27       | 12     | 38      |
| 103    | 433   | 14     | 67     | 607   | 122   | 132   | 99    | 65     | 16       | 8      | 21      |
| 104    | 231   | 7      | 32     | 320   | 57    | 64    | 45    | 37     | 9        | 5      | 11      |
| 105    | 105   | 0      | 14     | 160   | 24    | 28    | 23    | 23     | 5        | 3      | 6       |
